# Supplementary material
Source: PubMed Central journal article supplement (PMC6125129)
Supplement: NIHMS986109-supplement-Supplemental.pdf [file NIHMS986109-supplement-Supplemental.pdf]

# Functional peptidomics: Stimulus- and time-of-day-specific peptide release in the mammalian circadian clock

Norman Atkins, Jr.<sup>1†#a</sup>, Shifang Ren<sup>2†#b</sup>, Nathan Hatcher<sup>2,3#c</sup>, Penny W. Burgoon<sup>4#d</sup>, Jennifer W. Mitchell<sup>1,3,4</sup>, Jonathan V. Sweedler<sup>1,2,3</sup>, and Martha U. Gillette<sup>1,3,4\*</sup>

<sup>1</sup>Neuroscience Program, <sup>2</sup>Department of Chemistry, <sup>3</sup>Beckman Institute for Advanced Science and Technology, <sup>4</sup>Department of Cell and Developmental Biology, University of Illinois at Urbana-Champaign, Urbana, IL 61801

† Authors contributed equally to this work

\* Corresponding author. Email: mgillett@illinois.edu. Tel: 217-244-1355

## SUPPORTING INFORMATION

### Table of Contents

|                                                                                                                                                     |     |
|-----------------------------------------------------------------------------------------------------------------------------------------------------|-----|
| Supplementary Figure 1: Stimulus-evoked peptide release from rat SCN downstream of NMDA receptor (NMDAR) or PACAP receptor (PAC1R) activation ..... | II  |
| Supplementary Table 1: Peaks detected via MALDI TOF MS from stimulated releasate of the suprachiasmatic nucleus that have not been assigned.....    | III |

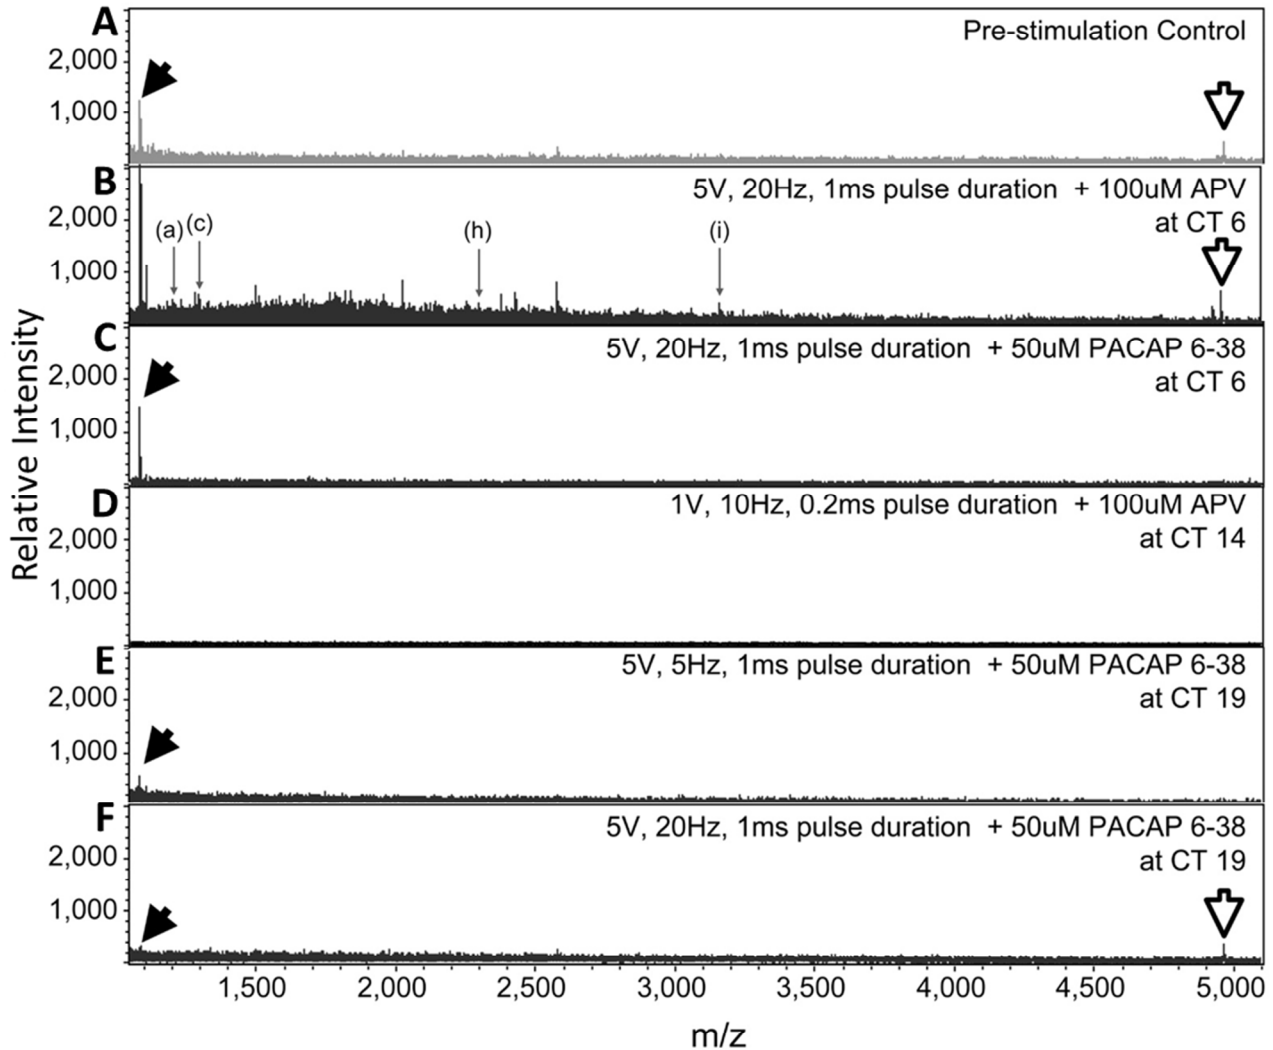

**Supplementary Figure 1.** Stimulus-evoked peptide release from rat SCN downstream of NMDA receptor (NMDAR) or PACAP receptor (PAC1R) activation is distinct. Releasate was collected during electrical stimulation of the ON following a 10-min incubation of the horizontal SCN slice with either the competitive NMDAR antagonist (2*R*)-amino-5-phosphonovaleric acid (APV; 100  $\mu$ M) or the competitive PAC1R antagonist PACAP 6-38 (10  $\mu$ M) at respective circadian time-points. **(A)** The pre-stimulation control shows little peptide release, as anticipated. **(B)** At CT 6, the NMDAR antagonist APV was ineffective in blocking stimulus-evoked SCN peptide release. **(C)** Peptide release was inhibited, however, with administration of PAC1R antagonist PACAP 6-38. **(D)** Early subjective nighttime (CT 14) stimulus-dependent peptide release was blocked by APV. **(E, F)** During late nighttime (CT 19), PACAP 6-38 prevented SCN peptide release following both 5 Hz (E) and 20 Hz (F) ON stimulation. In the presence of the glutamate antagonist APV, electrical stimulation at CT 6 triggered peptide release comparable to release observed under ON stimulation only conditions (B). Peptides observed in releasate profiles following pre-incubation in APV, include arginine vasopressin, neurokinin B **(a)**, angiotensin **(c)**, PEN **(h)**, and galanin **(i)**. The peptides arginine vasopressin (filled arrowhead) and  $\beta$ -4 thymosin (hollow arrowhead) were observed in both pre-stimulation control (A) and various stimulation conditions.

**Table S1. Peaks detected via MALDI TOF MS from stimulated releasate of the suprachiasmatic nucleus that have not been assigned**

| Observed m/z<br>(MH <sup>+</sup> ) | RHT Stimulus-Triggered Releasate Conditions |     |      |               |                |
|------------------------------------|---------------------------------------------|-----|------|---------------|----------------|
|                                    | Pre-Stim                                    | CT6 | CT14 | CT19<br>(5Hz) | CT19<br>(20Hz) |
| 1122.4                             |                                             |     |      |               | ●              |
| 1179.6                             |                                             |     | ●    |               |                |
| 1199.7                             |                                             | ●   |      |               |                |
| 1295.6                             |                                             |     |      | ●             |                |
| 1329.6                             |                                             |     | ●    |               |                |
| 1333.6                             |                                             |     | ●    |               |                |
| 1356.6                             |                                             |     | ●    |               |                |
| 1383.7                             |                                             |     | ●    |               |                |
| 1482.0                             |                                             | ●   |      |               |                |
| 1509.7                             |                                             |     |      | ●             |                |
| 1572.9                             |                                             | ●   |      |               |                |
| 1590.7                             |                                             |     | ●    |               |                |
| 1738.8                             |                                             |     | ●    |               |                |
| 1856.6                             |                                             | ●   |      | ●             |                |
| 1900.8                             |                                             | ●   |      |               |                |
| 1956.8                             |                                             |     |      | ●             |                |
| 2336.8                             |                                             |     | ●    |               |                |
| 2380.1                             |                                             | ●   | ●    | ●             |                |
| 2433.1                             |                                             | ●   | ●    | ●             |                |
| 2481.2                             |                                             | ●   | ●    | ●             | ●              |
| 2580.0                             |                                             | ●   | ●    | ●             | ●              |
| 3065.9                             |                                             | ●   |      |               |                |
